# Supplementary material
Source: Research Square preprint supplement (doi:10.21203/rs.3.rs-9012385/v1)
Supplement: Supplementary file 2 [file b48ef34a2a00258a4e1ab88c.docx]

**Table S1.** Molecular docking information.

| CurPocket | Vina score | Cavity volume (Å3) | Center (x, y, z) | Docking size (x, y, z) |
| --- | --- | --- | --- | --- |
| ESR1 | -7.7 | 685 | 34, 4, 18 | 23, 23, 23 |
| HMGCR | -7.9 | 2989 | 7, 17, 3 | 29, 23, 23 |
