# Supplementary material
Source: Research Square preprint supplement (doi:10.21203/rs.3.rs-9012385/v1)
Supplement: Supplementary file 3 [file e92f37adde0864738b7a15ce.pdf]

## ProTox-3.0 - TOXi

| Category                                   | Target                                                                                 | Gene          | Status   | Score |
|--------------------------------------------|----------------------------------------------------------------------------------------|---------------|----------|-------|
| Organ toxicity                             | Hepatotoxicity                                                                         | dili          | Inactive | 0.65  |
| Organ toxicity                             | Neurotoxicity                                                                          | neuro         | Active   | 0.57  |
| Organ toxicity                             | Nephrotoxicity                                                                         | nephro        | Inactive | 0.70  |
| Organ toxicity                             | Respiratory toxicity                                                                   | respi         | Inactive | 0.56  |
| Organ toxicity                             | Cardiotoxicity                                                                         | cardio        | Inactive | 0.77  |
| Toxicity end points                        | Carcinogenicity                                                                        | carcino       | Inactive | 0.56  |
| Toxicity end points                        | Immunotoxicity                                                                         | immuno        | Inactive | 0.67  |
| Toxicity end points                        | Mutagenicity                                                                           | mutagen       | Inactive | 0.71  |
| Toxicity end points                        | Cytotoxicity                                                                           | cyto          | Inactive | 0.70  |
| Toxicity end points                        | BBB-barrier                                                                            | bbb           | Active   | 0.65  |
| Toxicity end points                        | Ecotoxicity                                                                            | eco           | Inactive | 0.52  |
| Toxicity end points                        | Clinical toxicity                                                                      | clinical      | Active   | 0.53  |
| Toxicity end points                        | Nutritional toxicity                                                                   | nutri         | Inactive | 0.64  |
| Tox21-Nuclear receptor signalling pathways | Aryl hydrocarbon Receptor (AhR)                                                        | nr_ahr        | Inactive | 0.65  |
| Tox21-Nuclear receptor signalling pathways | Androgen Receptor (AR)                                                                 | nr_ar         | Inactive | 0.95  |
| Tox21-Nuclear receptor signalling pathways | Androgen Receptor Ligand Binding Domain (AR-LBD)                                       | nr_ar_lbd     | Inactive | 0.95  |
| Tox21-Nuclear receptor signalling pathways | Aromatase                                                                              | nr_aromatase  | Inactive | 0.90  |
| Tox21-Nuclear receptor signalling pathways | Estrogen Receptor Alpha (ER)                                                           | nr_er         | Inactive | 0.85  |
| Tox21-Nuclear receptor signalling pathways | Estrogen Receptor Ligand Binding Domain (ER-LBD)                                       | nr_er_lbd     | Inactive | 0.91  |
| Tox21-Nuclear receptor signalling pathways | Peroxisome Proliferator Activated Receptor Gamma (PPAR-Gamma)                          | nr_ppar_gamma | Inactive | 0.94  |
| Tox21-Stress response pathways             | Nuclear factor (erythroid-derived 2)-like 2/ antioxidant responsive element (nrf2/ARE) | sr_are        | Inactive | 0.81  |
| Tox21-Stress response pathways             | Heat shock factor response element (HSE)                                               | sr_hse        | Inactive | 0.81  |
| Tox21-Stress response pathways             | Mitochondrial Membrane Potential (MMP)                                                 | sr_mmp        | Inactive | 0.66  |
| Tox21-Stress response pathways             | Phosphoprotein (Tumor Suppressor) p53                                                  | sr_p53        | Inactive | 0.76  |
| Tox21-Stress response pathways             | ATPase family AAA domain-containing protein 5 (ATAD5)                                  | sr_atad5      | Inactive | 0.94  |
| Molecular Initiating Events                | Thyroid hormone receptor alpha (THR $\alpha$ )                                         | mie_thr_alpha | Inactive | 0.90  |
| Molecular Initiating Events                | Thyroid hormone receptor beta (THR $\beta$ )                                           | mie_thr_beta  | Inactive | 0.78  |
| Molecular Initiating Events                | Transthyretin (TTR)                                                                    | mie_ttr       | Inactive | 0.97  |
| Molecular Initiating Events                | Ryanodine receptor (RYP)                                                               | mie_ryr       | Inactive | 0.98  |
| Molecular Initiating Events                | GABA receptor (GABAR)                                                                  | mie_gabar     | Inactive | 0.96  |
| Molecular Initiating Events                | Glutamate N-methyl-D-aspartate receptor (NMDAR)                                        | mie_nmdar     | Inactive | 0.92  |
| Molecular Initiating Events                | alpha-amino-3-hydroxy-5-methyl-4-isoxazolepropionate receptor (AMPA)                   | mie_ampar     | Inactive | 0.97  |
| Molecular Initiating Events                | Kainate receptor (KAR)                                                                 | mie_kar       | Inactive | 0.99  |
| Molecular Initiating Events                | Achetylcholinesterase (AChE)                                                           | mie_ache      | Inactive | 0.65  |
| Molecular Initiating Events                | Constitutive androstane receptor (CAR)                                                 | mie_car       | Inactive | 0.98  |

| ⌘                           | ⌘                                               | ⌘          | ⌘        | ⌘    |
|-----------------------------|-------------------------------------------------|------------|----------|------|
| Molecular Initiating Events | Pregnane X receptor (PXR)                       | mie_pxr    | Inactive | 0.92 |
| Molecular Initiating Events | NADH-quinone oxidoreductase (NADHOX)            | mie_nadhox | Inactive | 0.97 |
| Molecular Initiating Events | Voltage gated sodium channel (VGSC)             | mie_vgsc   | Inactive | 0.95 |
| Molecular Initiating Events | Na <sup>+</sup> /I <sup>-</sup> symporter (NIS) | mie_nis    | Inactive | 0.98 |
| Metabolism                  | Cytochrome CYP1A2                               | CYP1A2     | Inactive | 0.77 |
| Metabolism                  | Cytochrome CYP2C19                              | CYP2C19    | Inactive | 0.64 |
| Metabolism                  | Cytochrome CYP2C9                               | CYP2C9     | Active   | 0.50 |
| Metabolism                  | Cytochrome CYP2D6                               | CYP2D6     | Inactive | 0.54 |
| Metabolism                  | Cytochrome CYP3A4                               | CYP3A4     | Inactive | 0.54 |
| Metabolism                  | Cytochrome CYP2E1                               | CYP2E1     | Inactive | 0.99 |
