# Supplementary material
Source: Research Square preprint supplement (doi:10.21203/rs.3.rs-9012385/v1)

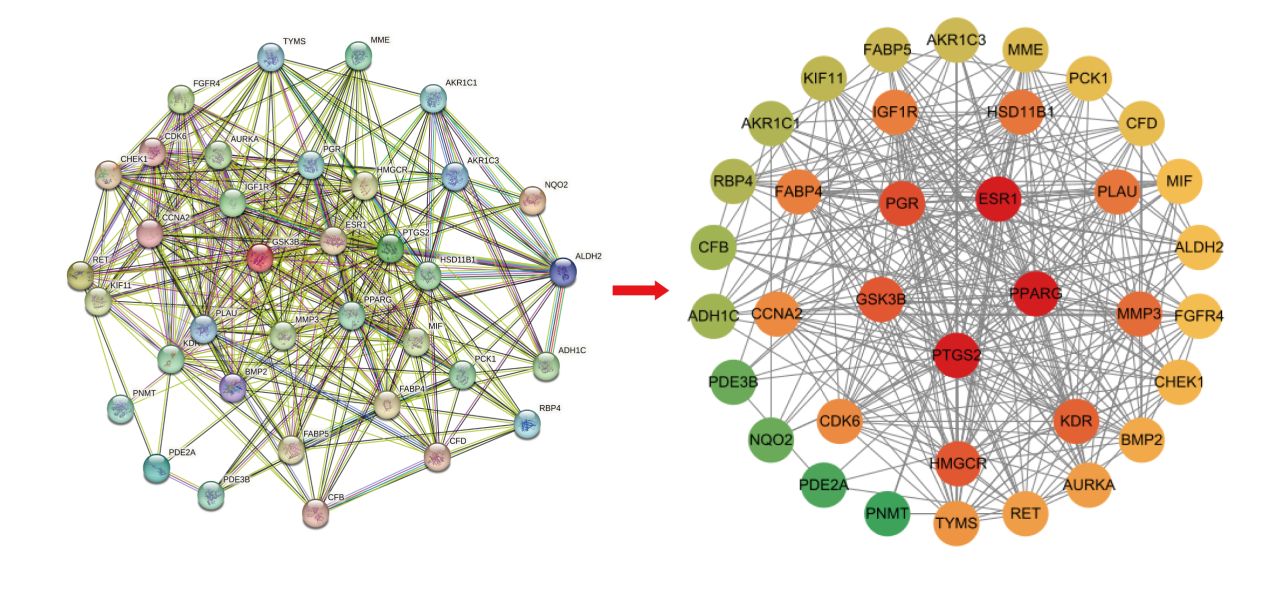
**Figure S1. Protein-protein interaction network of overlapping targets.**

Supplement: Supplementary file 1 [file 0c41cc03a76114529d364060.docx]
